# Supplementary material
Source: publisher figshare collection journal article supplement (https://gsapubs.figshare.com/ndownloader/files/23317346)
Supplement: Supplementary file 1 [file 23317346]

Parrish, J.T., et al., 2019, Earliest Jurassic U-Pb ages from carbonate deposits in the Navajo Sandstone, southeastern Utah, USA: *Geology*, v. 47, <https://doi.org/10.1130/G46338.1>

### **U-Pb Chemistry Methods Details**

Samples were microsampled with a Dremel tool, spiked with a mixed  $^{236}\text{U}$ - $^{205}\text{Pb}$  spike, and dissolved in nitric acid. Samples were capped and left on a hotplate for more than 12 hours before drying for column chemistry.

Fifty microliter columns made from Teflon shrink tubing with a cellulose frit were filled with Dowex AGX-1-8 200-400 mesh anion resin. Columns were cleaned with several reservoirs of deionized water, which elutes both U and Pb before equilibration with 0.7N HBr. Samples were redissolved in 0.7N HBr, typically about 100 microliters to make sure the aliquot is completely dissolved and loaded on the columns. The wash involves 250 microliters of 0.7N HBr, added twice ( $\sim 10\times$  column volume) to produce a clean Pb separate, which is eluted with 500 microliter of DI  $\text{H}_2\text{O}$ . The small loss of Pb in the wash step is more than compensated by the cleaner Pb cut. The load and wash steps were collected together for U. This was dried and then put through the same columns after equilibration with 7N  $\text{HNO}_3$ , to purify the U. The aliquots were dissolved with 100 microliters of 7N  $\text{HNO}_3$  and loaded on the equilibrated columns. The wash step used 250 microliters (150 + 100 microliters in two steps) of 7N  $\text{HNO}_3$  to wash everything but U out of the columns. The U was then eluted with 500 microliters of DI  $\text{H}_2\text{O}$ .

## **Sample descriptions**

The Rocky Tops (RT) samples are from a lacustrine carbonate unit (Parrish et al., 2017). Sample 0805123 has a thrombotic texture and 0805132 is finely laminated. Although the Navajo Ss is as much as 740 m thick in this region (Hintze and Kowallis, 2009), it is thinner near RT. A complete section measured by Parrish et al. (2017; their Big Wall locality) less than 2 km to the north is 135 m thick. The Horsethief Road (HR) sample has a thrombotic texture (Dorney et al., 2017) and is from near the middle of a tufa mound. The upper contact of the Navajo Ss does not crop out at either Horsethief Road or Rocky Tops.

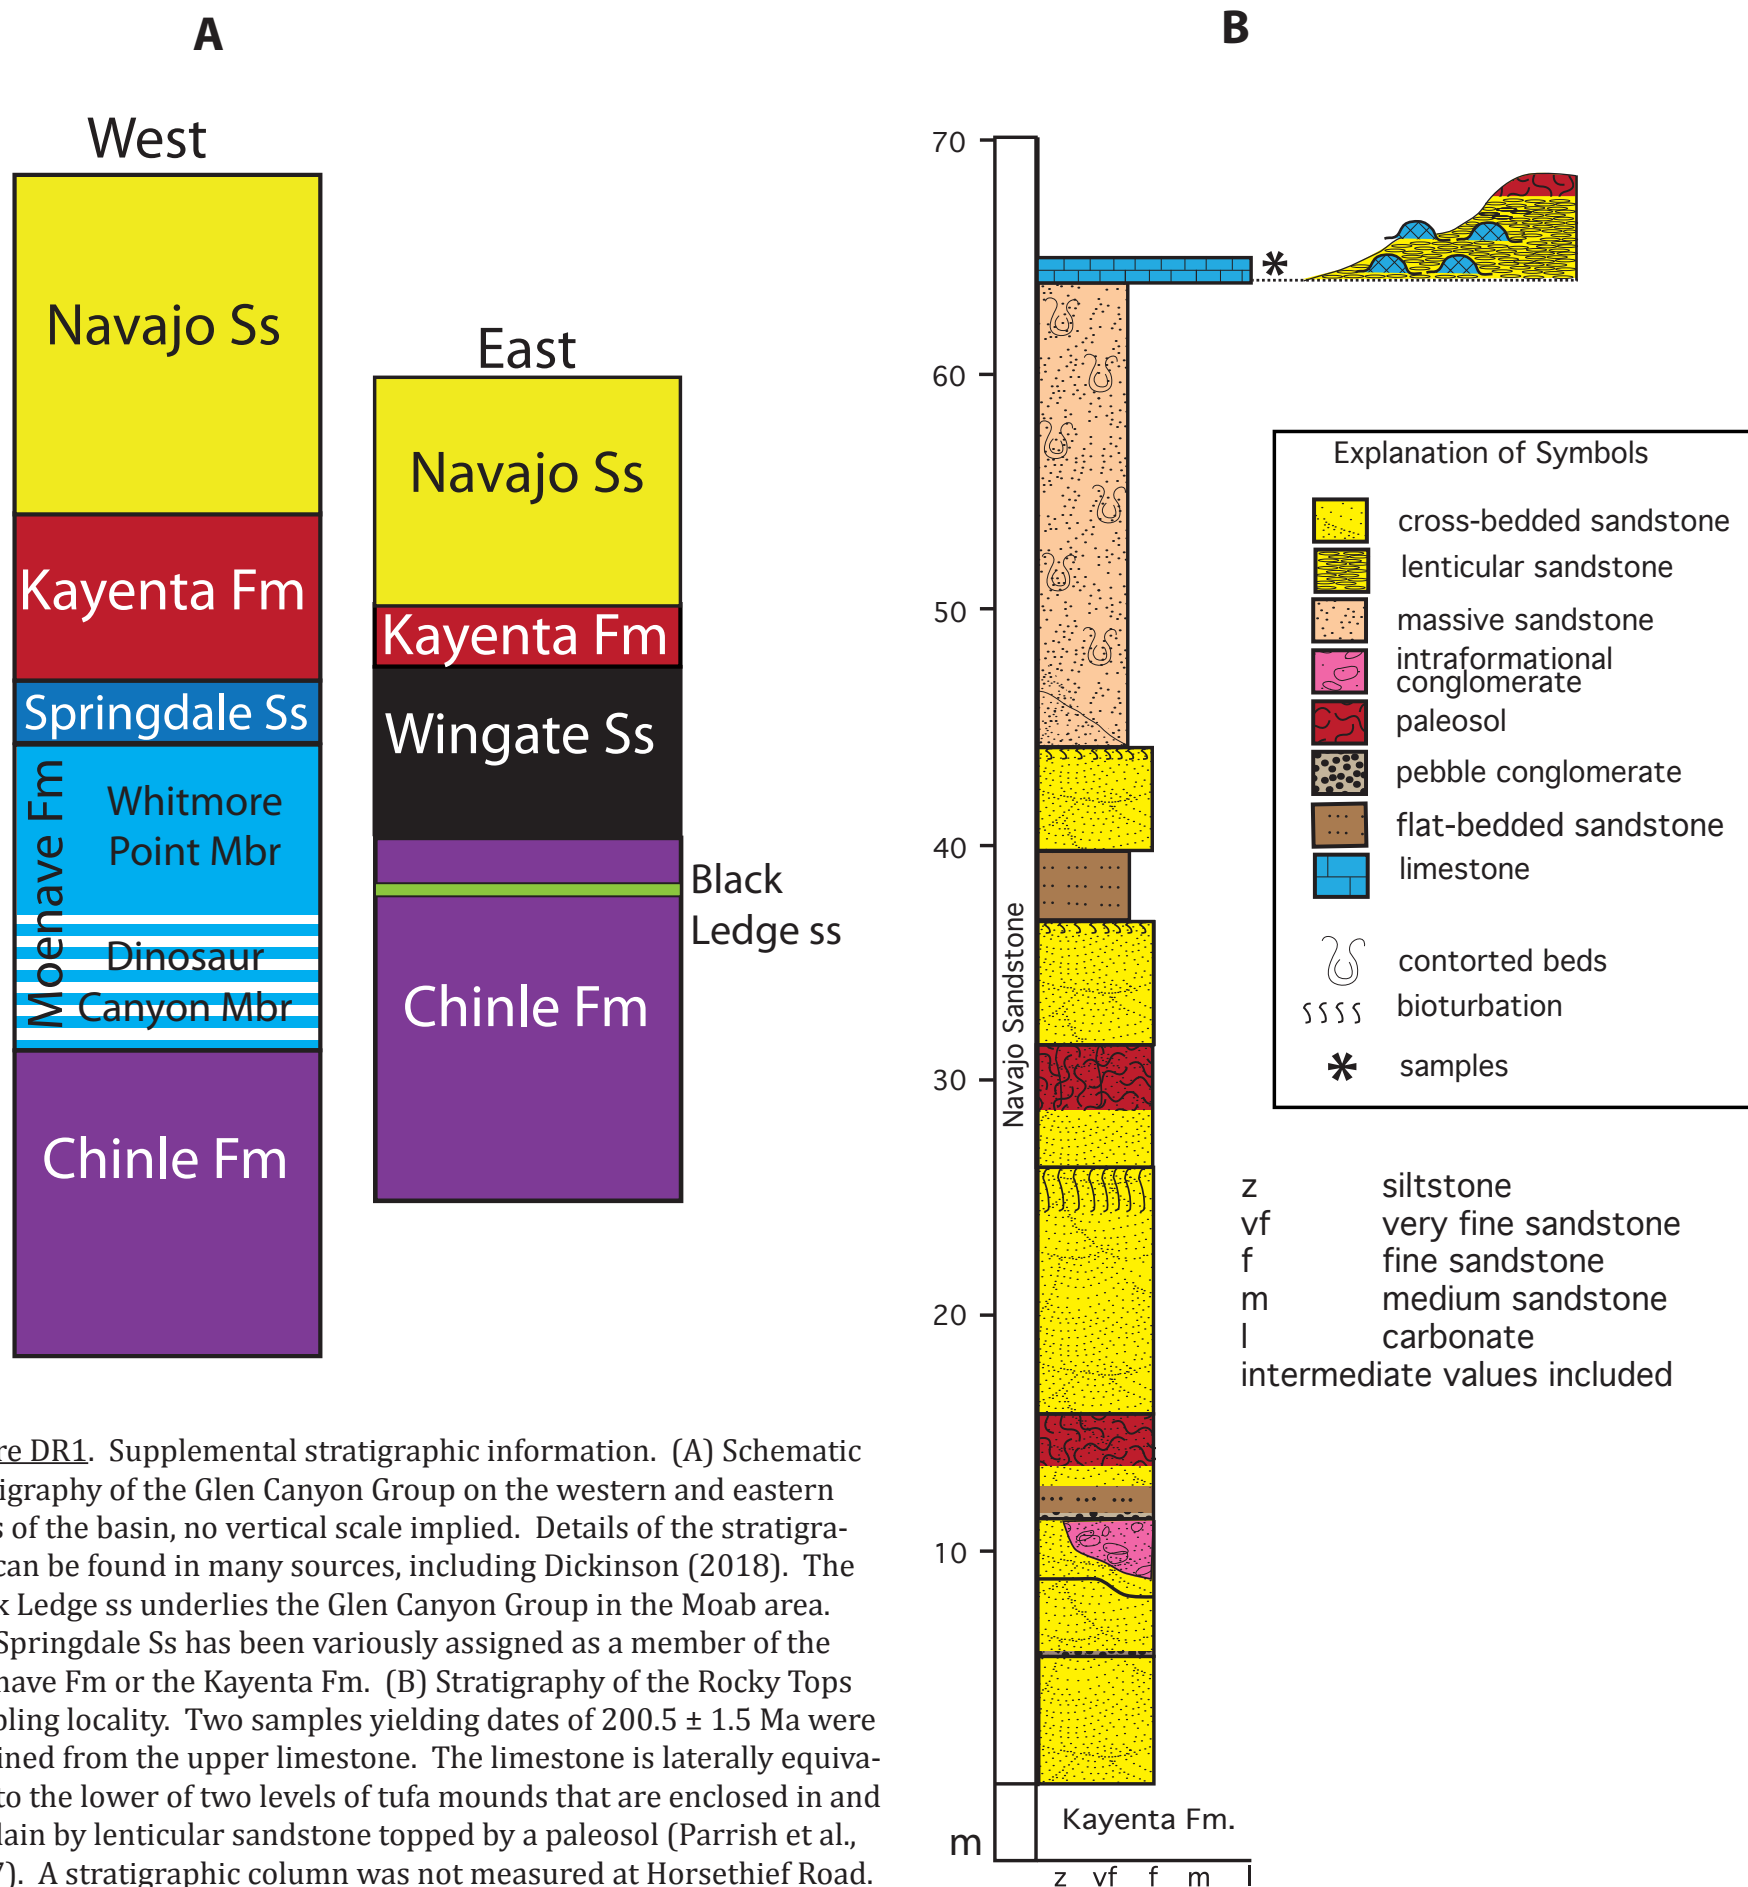

**Figure DR1.** Supplemental stratigraphic information. (A) Schematic stratigraphy of the Glen Canyon Group on the western and eastern sides of the basin, no vertical scale implied. Details of the stratigraphy can be found in many sources, including Dickinson (2018). The Black Ledge ss underlies the Glen Canyon Group in the Moab area. The Springdale Ss has been variously assigned as a member of the Moenave Fm or the Kayenta Fm. (B) Stratigraphy of the Rocky Tops sampling locality. Two samples yielding dates of  $200.5 \pm 1.5$  Ma were obtained from the upper limestone. The limestone is laterally equivalent to the lower of two levels of tufa mounds that are enclosed in and overlain by lenticular sandstone topped by a paleosol (Parrish et al., 2017). A stratigraphic column was not measured at Horsethief Road.

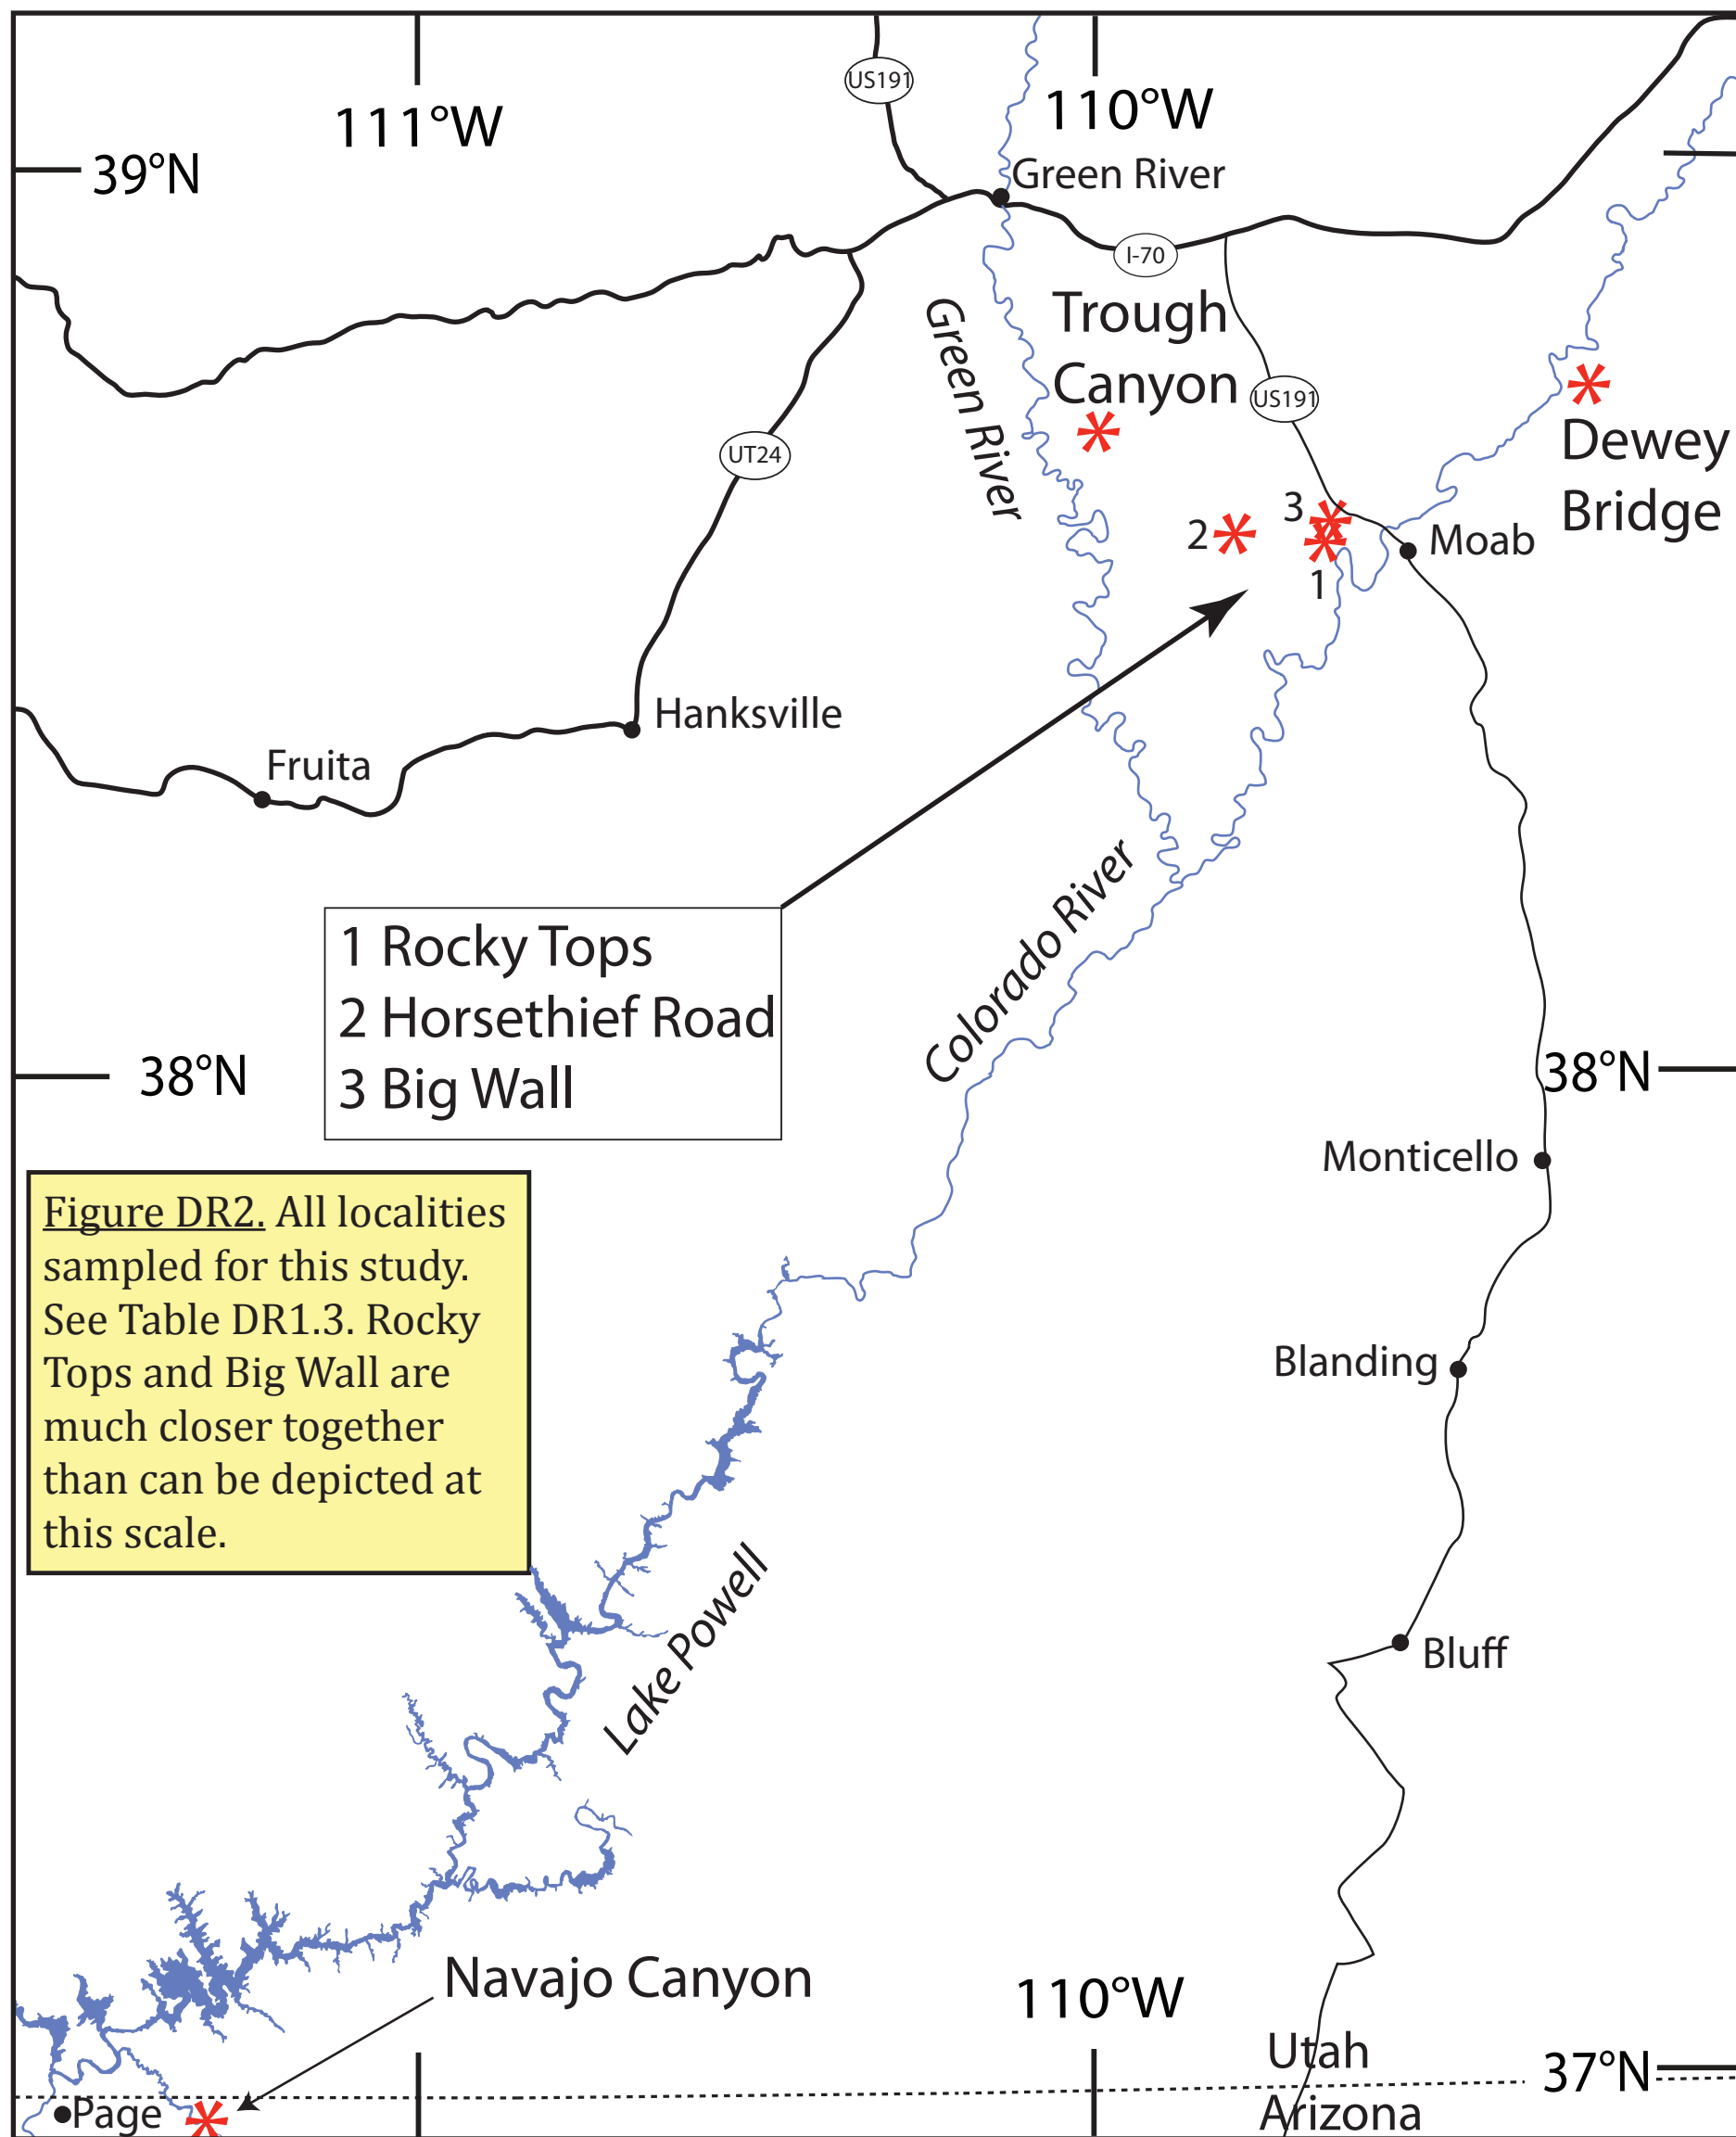

### **Tables DR1.**

Table DR1.1. Summary of detrital zircon ages from the Glen Canyon Group and subjacent strata from Dickinson and Gehrels (2009a, b).

| <u>Formation</u> | <u>Area collected</u>    | <u>Ages (Ma)</u><br>(2009b) | <u>Ages (Ma)*</u><br>(2009a) |
|------------------|--------------------------|-----------------------------|------------------------------|
| Navajo Ss        | North Wash               | 328                         | 331±8, 309±14                |
| Kayenta Fm       | Dolores                  | 244                         | 197±2, 197±2                 |
| Kayenta Fm       | North Wash               | 239                         | 208±5, 208±7                 |
| Kayenta Fm       | CP10 (near Moenkopi, AZ) | 229                         | 195±3, 195±3                 |
| Wingate Ss       | Hanksville               | 371                         | 298±8, 299±8                 |
| Springdale Ss    | CP37 (NE of Kanab, UT)   | 189                         | 201±6, 199±3                 |
| “Black Ledge Ss” | Moab                     | 197                         | 201±4, 199±3                 |

\*Single-grain (YSG) and calculated single-grain (YDZ) dates, respectively; see Dickinson and Gehrels (2009a) for more information.

Table DR1.2. Details for data in Figures 1 and 2.

| <u>Locale</u>                | <u>Stratigraphic unit</u>       | <u>Type of data</u>     | <u>Dates/Ages</u>                | <u>Reference</u>              |
|------------------------------|---------------------------------|-------------------------|----------------------------------|-------------------------------|
| Moab area, Utah              | Navajo Ss                       | U-Pb dates on limestone | 200.5±1.5, 197±7.7 Ma            | This study                    |
| Moab area, Utah              | Kayenta Fm                      | Paleomagnetic           | Late Triassic                    | Steiner and Helsley (1974)    |
| Gold Spring, Arizona         | Kayenta Fm                      | Detrital zircon         | 183.7±2.7 Ma                     | Marsh (2014)                  |
| Kanab area, Utah             | Kayenta Fm                      | Paleomagnetic           | 190-187 Ma                       | Steiner and Tanner (2014)     |
| Dolores, Colorado            | Kayenta Fm                      | Detrital zircons        | 197±2 Ma                         | Dickinson and Gehrels (2009a) |
| Moenkopi, Arizona            | Kayenta Fm                      | Detrital zircons        | 195±3 Ma                         | Dickinson and Gehrels (2009a) |
| Tuba City area, Arizona      | Kayenta Fm                      | Paleomagnetic           | Pliensbachian                    | Bazard and Butler (1991)      |
| Kithchen Corral Canyon, Utah | Springdale Ss                   | Detrital zircons        | 201±6, 199±3                     | Dickinson and Gehrels (2009a) |
| Kanab area, Utah             | Springdale Ss                   | Paleomagnetic           | Late Hettangian-early Sinemurian | Steiner (2014a)               |
| Kanab area, Utah             | Whitmore Point Mbr, Moenave Fm  | Paleomagnetic           | Hettangian                       | Steiner (2014b)               |
| Potter Canyon, Utah          | Whitmore Point Mbr, Moenave Fm  | Detrital zircons        | 201.33±0.07/0.12 Ma              | Suarez et al. (2017)          |
| Black Canyon, Utah           | Dinosaur Canyon Mbr, Moenave Fm | Detrital zircons        | 201.28 ±0.11/0.15 Ma             | Suarez et al. (2017)          |
| Echo Cliffs, Utah            | Dinosaur Canyon Mbr, Moenave Fm | Paleomagnetic           | Rhaetian-earliest Hettangian     | Molina-Garza et al. (2003)    |
| Tuba City area, Arizona      | Moenave Fm                      | Paleomagnetic           | Hettangian-Sinemurian            | Bazard and Butler (1991)      |
| Moab area, Utah              | “Black Ledge Ss”                | Detrital zircons        | 201±4, 199±3                     | Dickinson and Gehrels (2009a) |
| Comb Ridge, Utah             | Wingate Ss                      | Paleomagnetic           | Rhaetian (approx. 2 m.y.)        | Molina-Garza et al. (2003)    |
| San Rafael Swell, Utah       | Chinle Fm                       | Detrital zircons        | 203-204 Ma                       | Umbarger (2018)               |

Table DR1.3. Sample descriptions. Highlighted samples are the ones that yielded the dates reported here. See also Dorney et al. (2017) for more information on samples 0805004-0805032. Detailed petrography not available for samples 0805123-0805200 and 1505011.

| <u>Locality</u> | <u>Sample #</u> | <u>Description</u>                                               |
|-----------------|-----------------|------------------------------------------------------------------|
| Trough Canyon   | 0805004         | Peloidal packstone                                               |
| Trough Canyon   | 0805009         | Peloidal wackestone                                              |
| Trough Canyon   | 0805019*        | Chert replacing peloidal pack- or wackestone                     |
| Horsethief Road | 0805030*        | Thrombolitic carbonate mudstone (< 1%; isolated dolomite rhombs) |
| Horsethief Road | 0805031*        | Thrombolitic mudstone (5% dolomite; recrystallized)              |
| Horsethief Road | 0805032*        | Thrombolitic carbonate mudstone (5% dolomite; recrystallized)    |
| Rocky Tops      | 0805123         | Thrombolitic carbonate mudstone                                  |
| Rocky Tops      | 0805132         | Laminated carbonate mudstone                                     |
| Rocky Tops      | 0805143         | Carbonate mudstone                                               |
| Dewey Bridge    | 0805162*        | Carbonate mudstone                                               |
| Dewey Bridge    | 0805187*        | Carbonate mudstone                                               |
| Dewey Bridge    | 0805195         | Sandy carbonate mudstone                                         |
| Dewey Bridge    | 0805200         | Carbonate mudstone                                               |
| Navajo Canyon   | 0808002         | Dolomite                                                         |
| Navajo Canyon   | 0808004*        | Laminated fenestral mudstone (99% dolomite)                      |
| Navajo Canyon   | 0808008         | Thrombolitic carbonate mudstone (85% dolomite)                   |
| Big Wall        | 1505011         | Laminated carbonate mudstone                                     |

\*Samples from tufa mounds. See Parrish et al. (2017)

Reference: Dorney, L. J., Parrish, J. T., Hasiotis, S. T., and Chan, M. A., 2017, Petrography and environmental interpretation of tufa and lake carbonate in the Jurassic Navajo Sandstone of southeastern Utah: Journal of Sedimentary Research, v. 87, p. 967-985.

**Table DR1.4.** List of samples processed for U-Pb dates. Laser ablation results only. Highlighted samples were analyzed by isotope dilution to yield more precise dates, reported in the article. Locality names from Parrish et al. (2017); see Figure DR2.

| Sample No. | Locality        | $^{238}\text{U}/^{206}\text{Pb}$ | $^{207}\text{Pb}/^{206}\text{Pb}$ | U (ppm)   | Pb (ppm) | Outcome         |
|------------|-----------------|----------------------------------|-----------------------------------|-----------|----------|-----------------|
| 0805004    | Trough Canyon   | 1.5-6.1                          | 0.67-0.82                         | 4.6-13.8  | 9.6-26   | $184 \pm 59$ Ma |
| 0805009    | Trough Canyon   | 0.2-5.2                          | 0.71-0.92                         | 0.7-4.1   | 5.7-75   | $174 \pm 53$ Ma |
| 0805019    | Trough Canyon   | 9.1-27.3                         | 0.26-0.64                         | 0.5-2.4   | 0.1-1.0  | $145 \pm 15$ Ma |
| 0805030    | Horsethief Road | <2                               | 0.74-0.92                         | 0.2-2.6   | 2.3-8.7  | No age solution |
| 0805031    | Horsethief Road | 0.3-19.0                         | 0.32-0.85                         | 0.1-40    | 1.1-54   | $220 \pm 18$ Ma |
| 0805032    | Horsethief Road | 0.4-26.3                         | 0.4-0.9                           | 0.02-13.8 | 0.4-1.4  | $190 \pm 20$ Ma |
| 0805123    | Rocky Tops      | 0.2-13.7                         | 0.5-0.86                          | 0.6-9.6   | 2.2-33   | $251 \pm 21$ Ma |
| 0805132    | Rocky Tops      | 0.5-10                           | 0.6-0.89                          | 0.3-29.4  | 1.3-9.1  | $216 \pm 23$    |
| 0805143    | Rocky Tops      | 0.6-10.1                         | 0.54-0.82                         | 0.1-17.5  | 1.1-30.6 | $190 \pm 22$ Ma |
| 0805162    | Dewey Bridge    | 0-0.8                            | 0.78-0.98                         | 0.1-21.4  | 1.2-173  | No age solution |
| 0805187    | Dewey Bridge    | 0.4-4.4                          | 0.66-0.88                         | 0.2-1.9   | 2.5-31.3 | No age solution |
| 0805195    | Dewey Bridge    | 0-3.3                            | 0.69-0.91                         | 0.1-45.1  | 1.5-40.3 | No age solution |
| 0805200    | Dewey Bridge    | 0.06-4.8                         | 0.69-0.85                         | 0.2-14.4  | 7.9-89   | No age solution |
| 0808002    | Navajo Canyon   | 0.9-3.9                          | 0.72-0.82                         | 1.1-2.9   | 2.5-7.1  | $270 \pm 120$   |
| 0808004    | Navajo Canyon   | 2.7-5.7                          | 0.68-0.76                         | 3.6-7.0   | 8-33.6   | $211 \pm 59$    |
| 0808008    | Navajo Canyon   | 0-1.2                            | 0.78-0.98                         | 0.1-3.8   | 3.4-44.7 | No age solution |
| 1505011    | Big Wall        | 0.05-3.4                         | 0.76-0.9                          | 0.19-3.6  | 2.5-98   | $248 \pm 57$    |
